# Supplementary material for: Poly(Lactic Acid) Block Copolymers with Poly(Hexylene Succinate) as Microparticles for Long-Acting Injectables of Risperidone Drug
Source: MDPI journal article supplement (doi:10.3390/polym14194111), 2022-09-30
Supplement: s1 [file s1]

## Supplementary Materials

# Poly(Lactic Acid) Block Copolymers with Poly(Hexylene Succinate) as Microparticles for Long-Acting Injectables of Risperidone Drug

Iouliana Chrysafi <sup>1</sup>, Stavroula Nanaki <sup>2</sup>, Alexandra Zamboulis <sup>2</sup>, Margaritis Kostoglou <sup>3</sup>, Eleni Pavlidou <sup>1</sup> and Dimitrios N. Bikiaris <sup>2,\*</sup>

<sup>1</sup> Laboratory of Advanced Materials and Devices, Department of Physics, Faculty of Sciences, Aristotle University of Thessaloniki, GR-541 24 Thessaloniki, Greece

<sup>2</sup> Laboratory of Polymers Chemistry and Technology, Department of Chemistry, Faculty of Sciences, Aristotle University of Thessaloniki, GR-541 24 Thessaloniki, Greece

<sup>3</sup> Laboratory of Chemical and Environmental Technology, Aristotle University of Thessaloniki, GR-541 24 Thessaloniki, Greece

\* Correspondence: dbic@chem.auth.gr

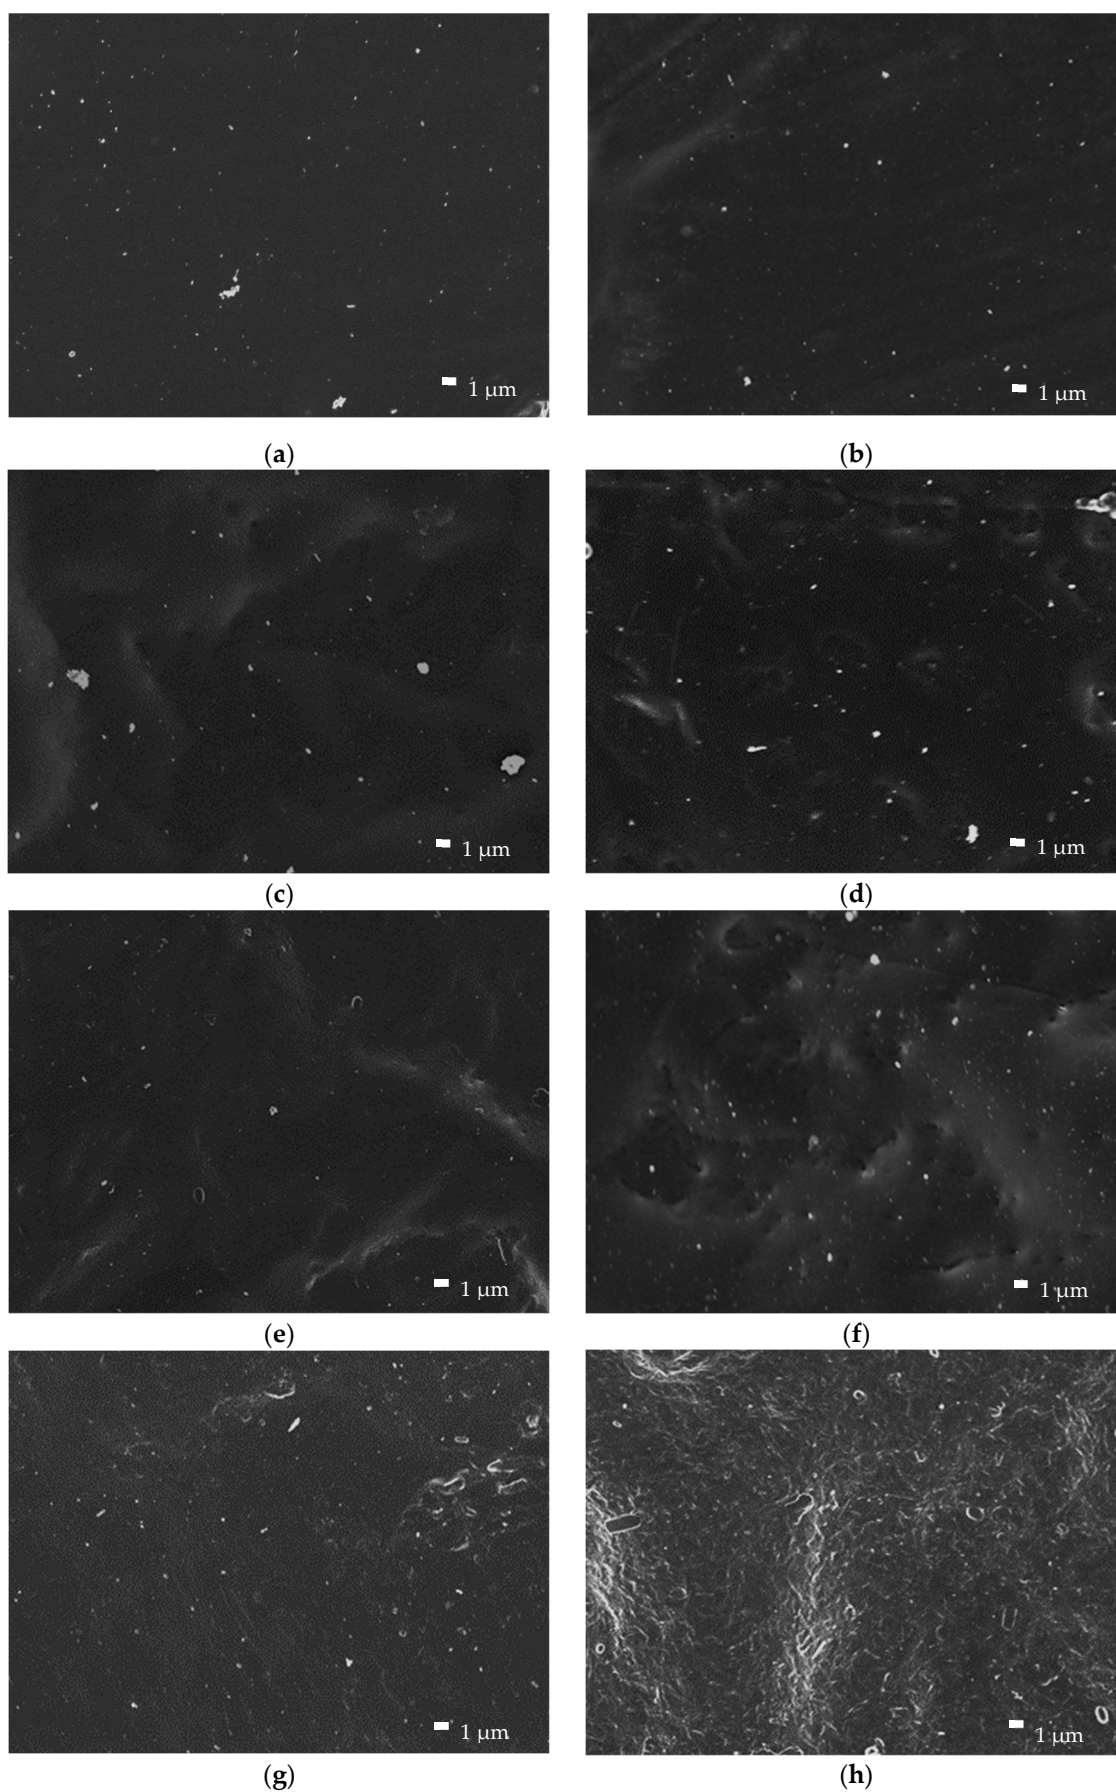

**Figure S1.** SEM microphotographs of PLA (a,b), PLA-b-PHSu 95/05 w/w (c,d), PLA-b-PHSu 90/10 w/w (e,f) and PLA-b-PHSu 80/20 w/w (g,h) before and after hydrolysis respectively.
